# Supplementary material for: Raman spectroscopic study of the structure of water in aqueous solutions of amphoteric polymers
Source: Royal Society of Chemistry journal article supplement (doi:10.1039/b513601f), 2006-01-01
Supplement: b513601f.pdf [file b513601f.pdf]

**Electronic Supplementary Information for :**

**Raman Spectroscopic Study on the Structure of Water  
in Aqueous Solution of Amphoteric Polymers**

**Hiroki Kitano,\* Kohei Takaha, Makoto Gemmei-Ide**

*Department of Chemical and Biochemical Engineering,  
Toyama University, Toyama 930-8555, Japan*

\* To whom correspondence should be addressed. Tel: +81-76-445-6868. Fax: +81-76-445-6703. E-mail:  
kitano@eng.toyama-u.ac.jp.

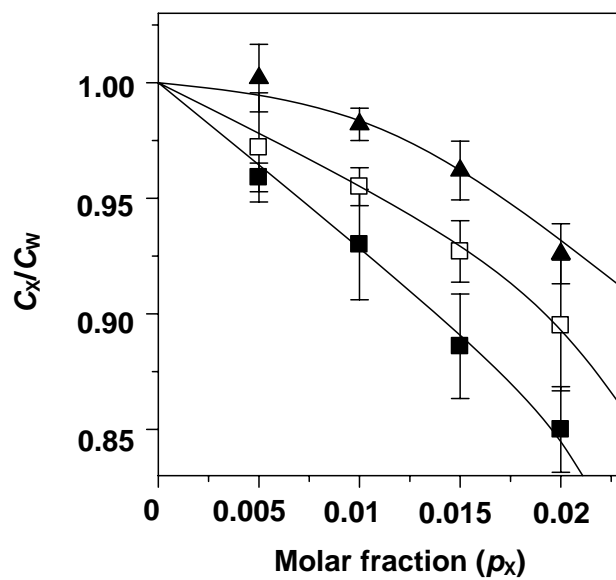

**Figure S1.** The effect of concentrations of various MA-MAPTAC copolymers on the  $C_x/C_w$  value at 25 °C.  
□, Polymer-1 (PolyMA). ▲, Polymer-3 (MA = 67 %). ■, Polymer-7 (PolyMAPTAC).

**Figure S1** shows the effect of concentration of various MA-MAPTAC copolymers, PolyMA and PolyMAPTAC on the  $C_X/C_W$  value, where  $C_X$  and  $C_W$  are the  $C$  values for an aqueous polymer solution and pure water, respectively. The  $C_X/C_W$  values for the polymer solutions were almost always slightly smaller than unity. In a solution of homopolymers, PolyMA (Polymer-1) and PolyMAPTAC (Polymer-7), the  $C_X/C_W$  value significantly decreased with an increase in the concentration, whereas in the solution of copolymer, Polymer-3, the  $C_X/C_W$  value more gradually decreased, and was always larger than those for the homopolymers (PolyMA (Polymer-1) and PolyMAPTAC (Polymer-7)). These results are due to the difference in the disturbing effect of the polymers on the H-bonded network structure of water.
